# Supplementary material for: Poling effects on the structural, electrical and photoluminescence properties in Sm doped BCST piezoelectric ceramics
Source: Royal Society of Chemistry journal article supplement (doi:10.1039/c8tc03960g), 2018-01-01
Supplement: c8tc03960g1.pdf [file c8tc03960g1.pdf]

## Electronic Supplementary Information

### *Poling Effects on the Structural, Electrical and Photoluminescence*

#### *Properties in Sm Doped BCST Piezoelectric Ceramics*

Wei Li, <sup>\*a</sup> Zhe Wang, <sup>a</sup> Jigong Hao, <sup>a</sup> Peng Fu, <sup>a</sup> Juan Du, <sup>a</sup> Ruiqing Chu<sup>b</sup> and Zhijun Xu<sup>\*b</sup>

<sup>a</sup> College of Materials Science and Engineering, Liaocheng University, Liaocheng 252059, China;

<sup>b</sup> School of Environmental and Materials Engineering, Yantai University, Yantai 264005, China.

Corresponding Authors.

\*E-mail: liwei\_727@163.com

\*\*E-mail: zhjxu@sohu.com

## Results and discussion section

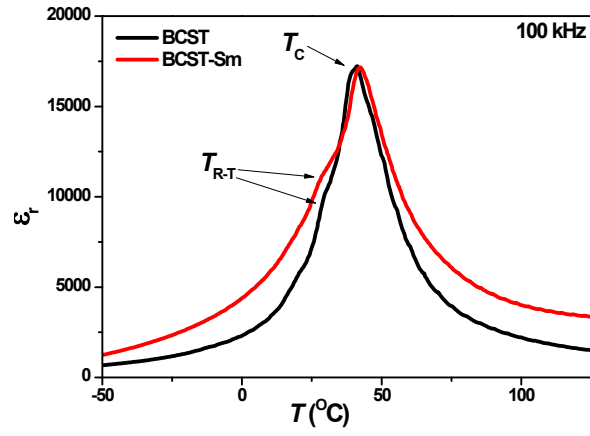

Fig. S1 The temperature dependence of dielectric constant  $\epsilon_r$  and dielectric loss  $\tan\delta$  of the BCST and BCST-Sm ceramics measured at 100 kHz.

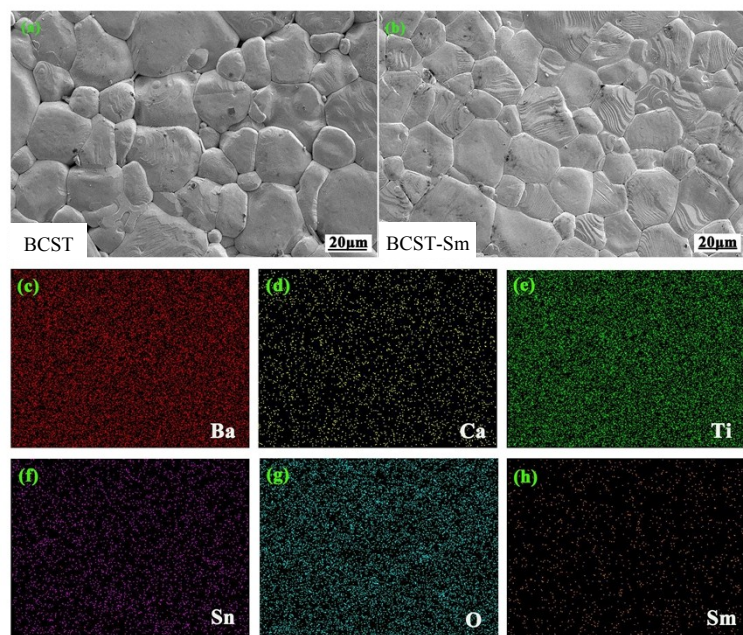

Fig. S2 The FE-SEM images of the (a) BCST, (b) BCST-Sm ceramics and (c - h) the element mappings of the BCST-Sm ceramics.

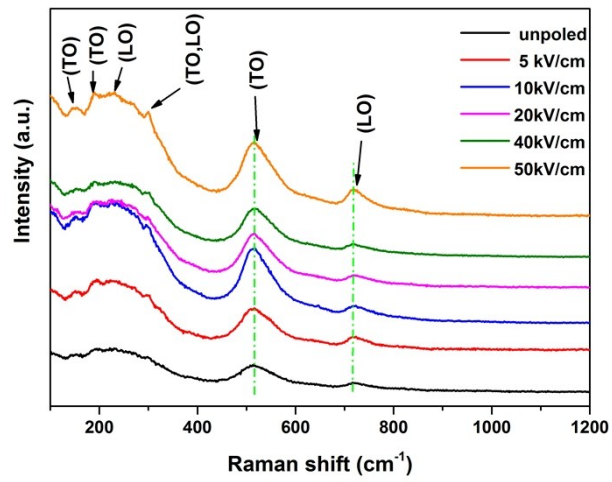

Fig. S3 Raman spectroscopy of the unpoled and poled BCST-Sm ceramics under different electric fields (5, 10, 20, 40 and 50 kV/cm).
